# Supplementary material for: CD22 blockade restores homeostatic microglial phagocytosis in ageing brains
Source: Springer Nature journal article supplement (doi:10.1038/s41586-019-1088-4), 2019-04-01

In the format provided by the authors and unedited.

# CD22 blockade restores homeostatic microglial phagocytosis in ageing brains

John V. Pluvinaige<sup>1,2,3</sup>, Michael S. Haney<sup>3</sup>, Benjamin A. H. Smith<sup>1,4,5</sup>, Jerry Sun<sup>3</sup>, Tal Iram<sup>3</sup>, Liana Bonanno<sup>1,3</sup>, Lulin Li<sup>3</sup>, Davis P. Lee<sup>3</sup>, David W. Morgens<sup>6</sup>, Andrew C. Yang<sup>3,5</sup>, Steven R. Shuken<sup>3,7</sup>, David Gate<sup>3</sup>, Madeleine Scott<sup>1,8,9</sup>, Purvesh Khatri<sup>8,9</sup>, Jian Luo<sup>3,10</sup>, Carolyn R. Bertozzi<sup>4,5,7,11</sup>, Michael C. Bassik<sup>5,6</sup> & Tony Wyss-Coray<sup>3,5,10,12,13\*</sup>

<sup>1</sup>Medical Scientist Training Program, Stanford University School of Medicine, Stanford, CA, USA. <sup>2</sup>Stem Cell Biology and Regenerative Medicine Graduate Program, Stanford University School of Medicine, Stanford, CA, USA. <sup>3</sup>Department of Neurology and Neurological Sciences, Stanford University School of Medicine, Stanford, CA, USA. <sup>4</sup>Department of Chemical and Systems Biology, Stanford University School of Medicine, Stanford, CA, USA. <sup>5</sup>Chemistry, Engineering, and Medicine for Human Health (ChEM-H), Stanford University, Stanford, CA, USA. <sup>6</sup>Department of Genetics, Stanford University School of Medicine, Stanford, CA, USA. <sup>7</sup>Department of Chemistry, Stanford University, Stanford, CA, USA. <sup>8</sup>Institute for Immunity, Transplantation and Infection, Stanford University School of Medicine, Stanford, CA, USA. <sup>9</sup>Department of Medicine, Division of Biomedical Informatics Research, Stanford University School of Medicine, Stanford, CA, USA. <sup>10</sup>Veterans Administration Palo Alto Healthcare System, Palo Alto, CA, USA. <sup>11</sup>Howard Hughes Medical Institute, Stanford University, Stanford, CA, USA. <sup>12</sup>Paul F. Glenn Center for the Biology of Aging, Stanford University School of Medicine, Stanford, CA, USA. <sup>13</sup>Wu Tsai Neurosciences Institute, Stanford University, Stanford, CA, USA. \*e-mail: [twc@stanford.edu](mailto:twc@stanford.edu)

# Supplementary Figure 1

Figure 2h

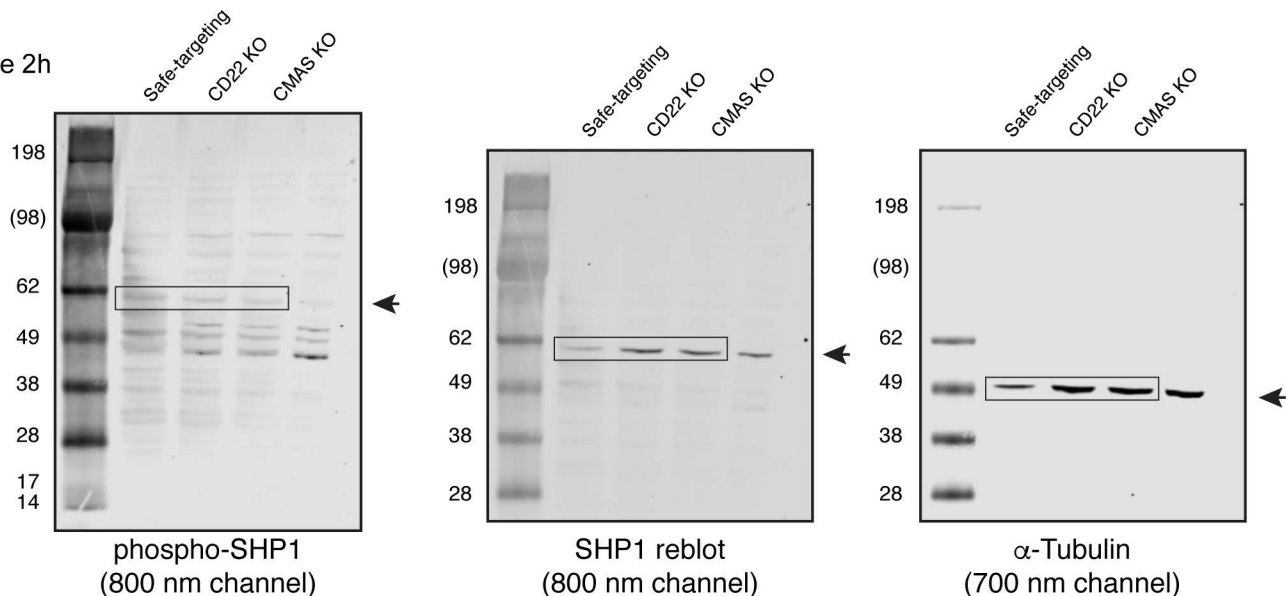

Extended Data Figure 4k

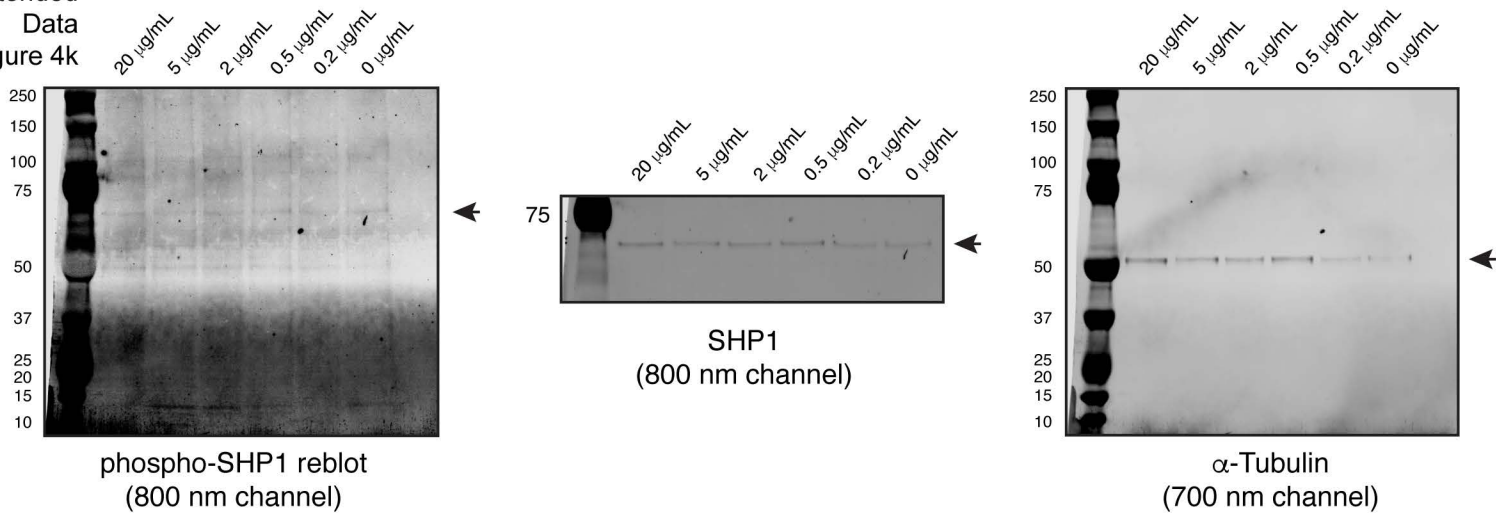

Extended Data Figure 6b

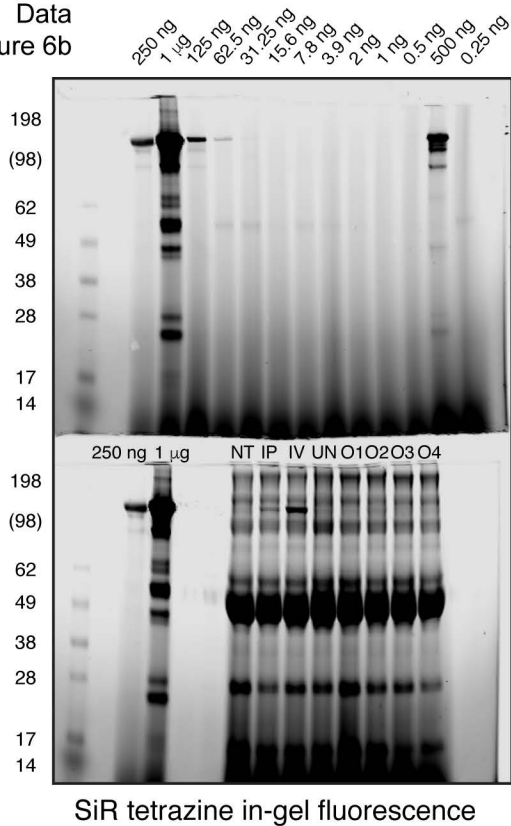

Extended Data Figure 4b

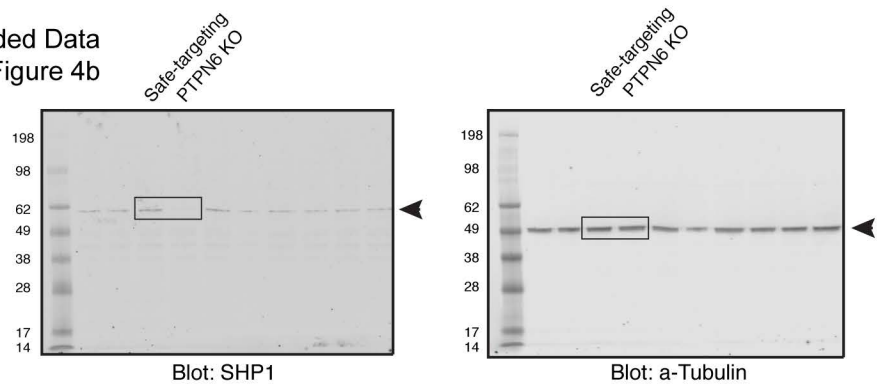

Extended Data Figure 8a, b

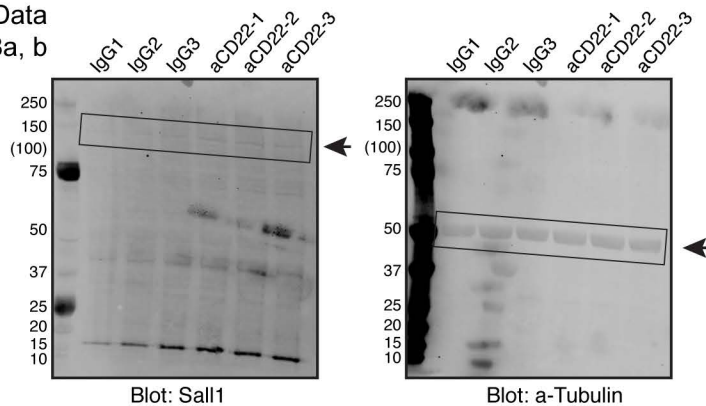

Supplement: 41586_2019_1088_MOESM1_ESM.pdf [file 41586_2019_1088_MOESM1_ESM.pdf]
