# Supplementary material for: CD22 blockade restores homeostatic microglial phagocytosis in ageing brains
Source: Springer Nature journal article supplement (doi:10.1038/s41586-019-1088-4), 2019-04-01
Supplement: 41586_2019_1088_MOESM2_ESM.pdf [file 41586_2019_1088_MOESM2_ESM.pdf]

## Reporting Summary

Nature Research wishes to improve the reproducibility of the work that we publish. This form provides structure for consistency and transparency in reporting. For further information on Nature Research policies, see [Authors & Referees](#) and the [Editorial Policy Checklist](#).

### Statistics

For all statistical analyses, confirm that the following items are present in the figure legend, table legend, main text, or Methods section.

n/a Confirmed

- The exact sample size ( $n$ ) for each experimental group/condition, given as a discrete number and unit of measurement
- A statement on whether measurements were taken from distinct samples or whether the same sample was measured repeatedly
- The statistical test(s) used AND whether they are one- or two-sided  
*Only common tests should be described solely by name; describe more complex techniques in the Methods section.*
- A description of all covariates tested
- A description of any assumptions or corrections, such as tests of normality and adjustment for multiple comparisons
- A full description of the statistical parameters including central tendency (e.g. means) or other basic estimates (e.g. regression coefficient) AND variation (e.g. standard deviation) or associated estimates of uncertainty (e.g. confidence intervals)
- For null hypothesis testing, the test statistic (e.g.  $F$ ,  $t$ ,  $r$ ) with confidence intervals, effect sizes, degrees of freedom and  $P$  value noted  
*Give  $P$  values as exact values whenever suitable.*
- For Bayesian analysis, information on the choice of priors and Markov chain Monte Carlo settings
- For hierarchical and complex designs, identification of the appropriate level for tests and full reporting of outcomes
- Estimates of effect sizes (e.g. Cohen's  $d$ , Pearson's  $r$ ), indicating how they were calculated

*Our web collection on [statistics for biologists](#) contains articles on many of the points above.*

### Software and code

Policy information about [availability of computer code](#)

Data collection FACS Diva (BD), ZEN Black (Zeiss), Imaris (Bitplane), Incucyte S3 (Essen), ImageStudio (LI-COR)

Data analysis FlowJo (Treestar), Prism 7 (GraphPad), R (DESeq2, ggplot2, tidyverse), ImageJ, GSEA v3 (Broad), Enrichr, Panther, casTLE

For manuscripts utilizing custom algorithms or software that are central to the research but not yet described in published literature, software must be made available to editors/reviewers. We strongly encourage code deposition in a community repository (e.g. GitHub). See the Nature Research [guidelines for submitting code & software](#) for further information.

### Data

Policy information about [availability of data](#)

All manuscripts must include a [data availability statement](#). This statement should provide the following information, where applicable:

- Accession codes, unique identifiers, or web links for publicly available datasets
- A list of figures that have associated raw data
- A description of any restrictions on data availability

Raw sequencing data will be deposited in NCBI GEO. Raw CRISPR screen count data (Supp Table 1), analyzed CRISPR hits (Supp Table 2), RNA-seq (Supp Table 3 and 4) are provided.

### Field-specific reporting

Please select the one below that is the best fit for your research. If you are not sure, read the appropriate sections before making your selection.

- Life sciences       Behavioural & social sciences       Ecological, evolutionary & environmental sciences

## Life sciences study design

All studies must disclose on these points even when the disclosure is negative.

|                 |                                                                                                                                                                                                                                                                                                                                                                                                                                                                                                                |
|-----------------|----------------------------------------------------------------------------------------------------------------------------------------------------------------------------------------------------------------------------------------------------------------------------------------------------------------------------------------------------------------------------------------------------------------------------------------------------------------------------------------------------------------|
| Sample size     | No power analyses were used to predetermine sample sizes. However, sample sizes were chosen based on prior literature using similar experimental paradigms.                                                                                                                                                                                                                                                                                                                                                    |
| Data exclusions | For long-term osmotic pump infusions, 4 mice were excluded and euthanized prior to experiment endpoint due to post-operative wound dehiscence. These exclusion criteria were predetermined as per relevant animal protocols.                                                                                                                                                                                                                                                                                   |
| Replication     | For in vitro experiments, technical triplicates as well as independent experiments on separate days were performed to ensure reproducibility. For in vivo experiments, biological replicates as well as independent cohorts of mice were used. CRISPR screen data, RNA-seq data, and aged CD22 <sup>-/-</sup> behavioral data were not replicated in independent experiments due to resource restrictions. All other data were replicated in at least two independent experiments as stated in figure legends. |
| Randomization   | For long-term osmotic pump infusions, mice were randomized into 2 groups using a random list generator (random.org).                                                                                                                                                                                                                                                                                                                                                                                           |
| Blinding        | All immunohistochemical and behavioral analyses were performed by a blinded observer.                                                                                                                                                                                                                                                                                                                                                                                                                          |

## Reporting for specific materials, systems and methods

We require information from authors about some types of materials, experimental systems and methods used in many studies. Here, indicate whether each material, system or method listed is relevant to your study. If you are not sure if a list item applies to your research, read the appropriate section before selecting a response.

### Materials & experimental systems

| n/a                                 | Included in the study                                           |
|-------------------------------------|-----------------------------------------------------------------|
| <input type="checkbox"/>            | <input checked="" type="checkbox"/> Antibodies                  |
| <input type="checkbox"/>            | <input checked="" type="checkbox"/> Eukaryotic cell lines       |
| <input checked="" type="checkbox"/> | <input type="checkbox"/> Palaeontology                          |
| <input type="checkbox"/>            | <input checked="" type="checkbox"/> Animals and other organisms |
| <input checked="" type="checkbox"/> | <input type="checkbox"/> Human research participants            |
| <input checked="" type="checkbox"/> | <input type="checkbox"/> Clinical data                          |

### Methods

| n/a                                 | Included in the study                              |
|-------------------------------------|----------------------------------------------------|
| <input checked="" type="checkbox"/> | <input type="checkbox"/> ChIP-seq                  |
| <input type="checkbox"/>            | <input checked="" type="checkbox"/> Flow cytometry |
| <input checked="" type="checkbox"/> | <input type="checkbox"/> MRI-based neuroimaging    |

## Antibodies

### Antibodies used

Flow cytometry: CD11b (clone M1/70, BioLegend, cat. no. 101205, 1:100), CD45 (clone 30-F11, Biolegend, cat. no. 147708, 1:100), Siglec-1 (clone REA197, Miltenyi Biotec, cat. no. 130-105-004, 1:10), CD22 (clone OX-97, Biolegend, cat. no. 126112, 1:100), Siglec-E (clone M1304A01, Biolegend, cat. no. 677106, 1:100), Siglec-F (clone ES22-10D8, Miltenyi Biotec, cat. no. 130-102-241, 1:10), Siglec-G (clone SH1, BD Biosciences, cat. no. 563336, 1:100), Siglec-H (clone 551, Biolegend, cat. no. 129612, 1:100), CD33 (clone 9A11, eBioscience, cat. no. 17-0331-82, 1:100)  
 IHC: goat anti-Iba1 (1:500, ab5076, Abcam), goat anti-Prox1 (1:500, AF2727, R&D), rabbit anti-c-Fos (1:400, 9F6, Cell Signaling), rabbit anti-amyloid beta (1:200, D54D2, Cell Signaling), rabbit anti-alpha-synuclein (1:200, MJFR1, Abcam), rabbit anti-p-CREB (1:500, 06-519, Millipore), rabbit anti-synaptophysin (1:500, D8F6H, Cell Signaling), rabbit anti-PSD95 (1:500, D27E11, Cell Signaling), rabbit anti-C1q (1:1200, ab182451, Abcam), goat anti-doublecortin (1:500, SC8066, Santa Cruz Biotech), anti-Tmem119 (1:200, 28-3, Abcam)  
 WB: mouse anti-a-tubulin (1:10,000, T9026, Sigma), rabbit anti-pSHP-1 (1:5,000, D11G5, Cell Signaling), anti-SHP-1 (1:10,000, C14H6, Cell Signaling), anti-Sall1 (1:1000, ab31526, Abcam)  
 In vivo: mouse IgG1 isotype control antibody (MOPC21, BioXCell, cat. no. BE0083, 1mg/mL) or anti-CD22 (Cy34, BioXCell, cat. no. BE0011, 1mg/mL)

### Validation

All antibodies were validated for the indicated applications by the manufacturer. For the anti-CD22 flow cytometry antibody (Ox97), we confirmed specificity using a KO control. For the anti-CD22 therapeutic antibody (Cy34) used in vivo, we confirmed function-blocking activity in ligand binding, signaling, and internalization assays.

## Eukaryotic cell lines

Policy information about [cell lines](#)

|                     |                                                                                                         |
|---------------------|---------------------------------------------------------------------------------------------------------|
| Cell line source(s) | BV2 cells (E. Blasi), HEK293T (ATCC)                                                                    |
| Authentication      | Cell line authentication was performed by the supplier, but not independently authenticated in our lab. |

Mycoplasma contamination

Commonly misidentified lines (See [ICLAC](#) register)

## Animals and other organisms

Policy information about [studies involving animals](#); [ARRIVE guidelines](#) recommended for reporting animal research

Laboratory animals

Wild animals

Field-collected samples

Ethics oversight

Note that full information on the approval of the study protocol must also be provided in the manuscript.

## Flow Cytometry

### Plots

Confirm that:

- The axis labels state the marker and fluorochrome used (e.g. CD4-FITC).
- The axis scales are clearly visible. Include numbers along axes only for bottom left plot of group (a 'group' is an analysis of identical markers).
- All plots are contour plots with outliers or pseudocolor plots.
- A numerical value for number of cells or percentage (with statistics) is provided.

### Methodology

Sample preparation

Instrument

Software

Cell population abundance

Gating strategy

- Tick this box to confirm that a figure exemplifying the gating strategy is provided in the Supplementary Information.
